# Supplementary material for: Rapid, Sensitive On-Site Detection of Deoxynivalenol in Cereals Using Portable and Reusable Evanescent Wave Optofluidic Immunosensor
Source: MDPI journal article supplement (doi:10.3390/ijerph19073759), 2022-03-22
Supplement: s1 [file s1]

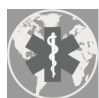

## Supporting Information:

# Rapid, Sensitive On-Site Detection of Deoxynivalenol in Cereals Using Portable and Reusable Evanescent Wave Optofluidic Immunosensor

### The ELISA method for DON detection

To achieve DON detection using ELISA, the coating antigen DON-BSA was diluted with sodium carbonate/bicarbonate buffer ( $0.1 \text{ mol}\cdot\text{L}^{-1}$ ) to a concentration of  $1.0 \text{ }\mu\text{g}\cdot\text{mL}^{-1}$ , and  $100 \text{ }\mu\text{L}$  of the solution was added to each well of a 96-well microtiter plate. Then, the plate was covered and incubated overnight at  $4 \text{ }^{\circ}\text{C}$  ( $> 12 \text{ h}$ ). The wells were emptied, washed three times with PBST and dried. Each well was blocked with a  $200 \text{ }\mu\text{L}$  BSA solution ( $2\%$ , w/v) for  $2 \text{ h}$ . The wells were subsequently emptied and washed again three times with a PBST. A  $50 \text{ }\mu\text{L}$ /well of DON solution of various concentrations, and a  $50 \text{ }\mu\text{L}$ /well of anti-DON antibody at the dilution ratio of  $1:10000$  was added. Inhibition standard curves were prepared with a DON concentration ranging from  $0.01$  to  $1000 \text{ }\mu\text{g}\cdot\text{L}^{-1}$ . The competitive reaction was allowed to take place for  $60 \text{ min}$ . After washing, the peroxidase-labeled goat anti-mouse immunoglobulins at the dilution ratio of  $1:1000$  was added, and incubated for  $30 \text{ min}$ . Next, a  $50 \text{ }\mu\text{L}$ /well of freshly prepared tetramethylbenzidine (TMB) was added, and incubated for  $15 \text{ min}$ . The chemiluminescent emission of each well was measured after adding sulfuric acid for  $10 \text{ s}$ . All of the incubations were performed at  $37 \text{ }^{\circ}\text{C}$ .

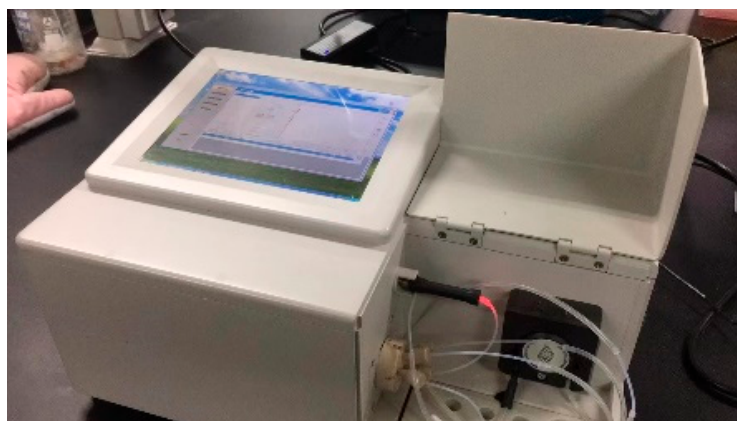

**Figure S1.** Photo of OIP-v2. The OIP-v2 has a size of  $36\times 25\times 18\text{cm}$  and a weight of  $2.5 \text{ kg}$ .

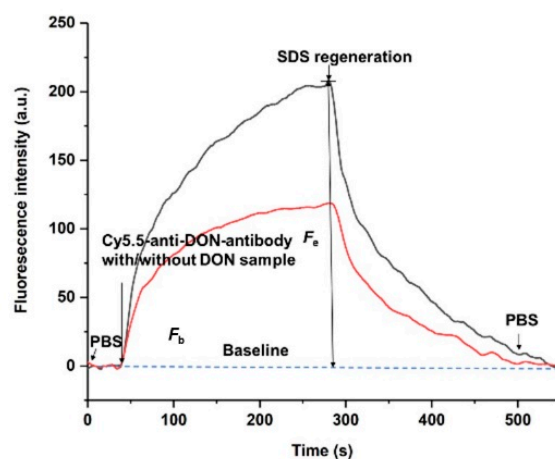

**Figure S2.** Feasibility of the DON-BSA functionalized bio-probe for DON detection. The concentration of the Cy5.5-anti-DON antibody and DON are 0.5  $\mu\text{g/mL}$  and 100  $\mu\text{g/L}$ , respectively.

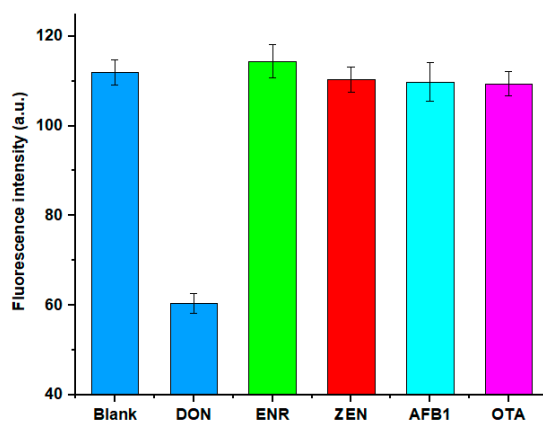

**Figure S3.** Selectivity of the Cy5.5-anti-DON antibody. The concentration of the anti-DON antibody is 0.25  $\mu\text{g}\cdot\text{mL}^{-1}$  and the concentration of DON, ENR, ZEN, AFB<sub>1</sub> and OTA is 10.0  $\mu\text{g}\cdot\text{L}^{-1}$ .

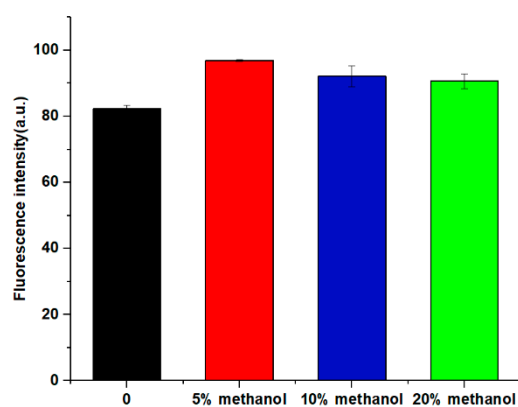

**Figure S4.** The effective fluorescence signal values at various methanol concentrations (0, 5%, 10%, 20% and v/v) without adding DON.

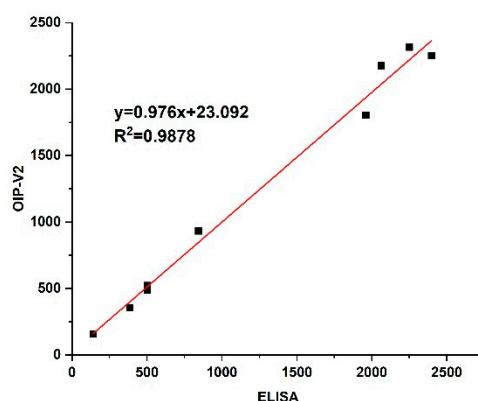

**Figure S5.** Comparison between the OIP-v2 and ELISA for the simultaneous detection of nine maize-positive samples.

**Table S1.** Comparison of analysis methods for DON and the OIP-V2 based assays.

| Analytical Methods            | Dynamic Detection Range<br>( $\mu\text{g}\cdot\text{L}^{-1}$ ) | LOD<br>( $\mu\text{g}\cdot\text{L}^{-1}$ ) | Reference |
|-------------------------------|----------------------------------------------------------------|--------------------------------------------|-----------|
| UPLC-MS                       | 2-800                                                          | 0.5                                        | [1]       |
| TRFIA                         | 0.5-50                                                         | 0.2                                        | [2]       |
| ELISA                         | 1-100                                                          | 0.56                                       | [3]       |
| FGN based ICS                 | 5-20                                                           | 5                                          | [4]       |
| Nanobody-based immunoassay    | 2.18–62.25                                                     | 1.16                                       |           |
| Inhibition-based immunosensor | 6-30                                                           | 0.3                                        | [5]       |
| OIP-V2                        | 0.43-36.61                                                     | 0.16                                       | This work |

## References

1. Zhang, J.; Sun, Y.; Zhao, L.; Gao, F.; Li, Y.; Ren, S. Comparative study of cation and anion ionization modes for detection of deoxynivalenol by ultra performance liquid chromatography-tandem mass spectrometry. *J. Food Saf. Qual.* **2017**, *8*, 3969–3973.
2. Jue, Z. Study on Rapidly Simultaneous Detection of Deoxynivalenol and Zearalenone. *China Biotechnol.* **2009**, *29*, 82–88.
3. Zhang, Y.Z. Establishment of the Direct Competition ELISA Method for Deoxynivalenol(DON). *J. Food Sci. Biotechnol.* **2012**, *31*, 28–32.
4. Huang, X.Y.; Huang, T.; Li, X.J.; Huang, Z.B. Flower-like gold nanoparticles-based immunochromatographic test strip for rapid simultaneous detection of fumonisin B<sub>1</sub> and deoxynivalenol in Chinese traditional medicine. *J. Pharm. Biomed. Anal.* **2019**, *177*, 112895.
5. Sunday, C.E.; Masikini, M.; Wilson, L.; Rassie, C.; Waryo, T.; Baker, P.G.L.; Iwuoha, E.I. Application on Gold Nanoparticles-Dotted 4-Nitrophenylazo Graphene in a Label-Free Impedimetric Deoxynivalenol Immunosensor. *Sensors* **2015**, *15*, 3854–3871.
